# Supplementary material for: Cobalt-catalyzed electrooxidative C-H/N-H [4+2] annulation with ethylene or ethyne
Source: PubMed Central journal article supplement (PMC5824839; doi:10.1038/s41467-018-03246-4), 2018-02-23
Supplement: 41467_2018_3246_MOESM2_ESM.pdf [file 41467_2018_3246_MOESM2_ESM.pdf]

Editorial Note: this manuscript has been previously reviewed at another journal that is not operating a transparent peer review scheme. This document only contains reviewer comments and rebuttal letters for versions considered at Nature Communications.

Reviewer #1 (Remarks to the Author):

Lei and collaborators present here cobalt-catalyzed dehydrogenative C-H/N-H [4+2] annulation of aryl/vinyl amides with ethylene or ethyne by using an electrochemical reaction protocol. This protocol avoids the use of external chemical oxidants and co-oxidants, providing a green approach for C-H functionalization. However, a similar study has been reported by Lutz Ackermann (10.1002/anie.201712647) on the electrochemical alkyne annulation by cobalt-catalyzed C-H/N-H activation under ambient reaction conditions. In other words, this work does not show the first example of electrochemical recycling of cobalt catalyst in oxidative C-H functionalization reactions. In addition, the highly similar work has been demonstrated in Daugulis' group on cobalt-catalyzed oxidative C-H/N-H [4+2] annulation of aryl/vinyl amides with alkenes or alkynes (Angew. Chem. Int. Ed. 2014, 53, 10209-10212 and Org. Lett. 2014, 16, 4684-4687). For these reasons, I cannot recommend this publication of this work in Nature Communications.

Reviewer #2 (Remarks to the Author):

In their revised manuscript Lei and co-workers have performed a tremendous work to improve the experimental part to further substantiate the conclusions. In particular, I would like to emphasize the importance of the kinetic studies which now allow them to reveal the rate-controlling step of the proposed mechanism. Overall, I am very satisfied with their comments and I fully support the publication of this work in Nature Communications.

Reviewer #3 (Remarks to the Author):

The authors have undertaken significant additional experiments to address my previous comments and questions. The experiments on a wider range of proton acceptors, detection of hydrogen gas, alternative substrates, full cell potential, and mechanism help to elevate this work and further increase impact. Overall, I feel that the paper will be impactful due to high selectivity and electrochemical cycling of the catalyst, and that the work is suitable for publication in Nature Communications.

# Response Letter

## **Reviewer #1 (Remarks to the Author):**

Lei and collaborators present here cobalt-catalyzed dehydrogenative C-H/N-H [4+2] annulation of aryl/vinyl amides with ethylene or ethyne by using an electrochemical reaction protocol. This protocol avoids the use of external chemical oxidants and co-oxidants, providing a green approach for C-H functionalization. However, a similar study has been reported by Lutz Ackermann (10.1002/anie.201712647) on the electrochemical alkyne annulation by cobalt-catalyzed C-H/N-H activation under ambient reaction conditions. In other words, this work does not show the first example of electrochemical recycling of cobalt catalyst in oxidative C-H functionalization reactions. In addition, the highly similar work has been demonstrated in Daugulis' group on cobalt-catalyzed oxidative C-H/N-H [4+2] annulation of aryl/vinyl amides with alkenes or alkynes (Angew. Chem. Int. Ed. 2014, 53, 10209-10212 and Org. Lett. 2014, 16, 4684-4687). For these reasons, I cannot recommend this publication of this work in Nature Communications.

**Our response:** We have cited the similar work of Ackermann and co-workers published during the submission of our manuscript in Ref. 29. At the same time, the works of Daugulis have been clearly mentioned and a short comparison with our work has been made.

## **Reviewer #2 (Remarks to the Author):**

In their revised manuscript Lei and co-workers have performed a tremendous work to improve the experimental part to further substantiate the conclusions. In particular, I would like to emphasize the importance of the kinetic studies which now allow them to reveal the rate-controlling step of the proposed mechanism. Overall, I am very satisfied with their comments and I fully support the publication of this work in Nature Communications.

**Our response:** Thanks for the comments.

## **Reviewer #3 (Remarks to the Author):**

The authors have undertaken significant additional experiments to address my previous comments and questions. The experiments on a wider range of proton acceptors, detection of hydrogen gas, alternative substrates, full cell potential, and mechanism help to elevate this work and further increase impact. Overall, I feel that the paper will be impactful due to high selectivity and electrochemical cycling of the catalyst, and that the work is suitable for publication in Nature Communications.

**Our response:** Thanks for the comments.
